# Supplementary material
Source: PubMed Central journal article supplement (PMC3367893)
Supplement: supp_blood-2011-10-388736_blood-2011-10-388736-1.pdf [file supp_blood-2011-10-388736_blood-2011-10-388736-1.pdf]

**A**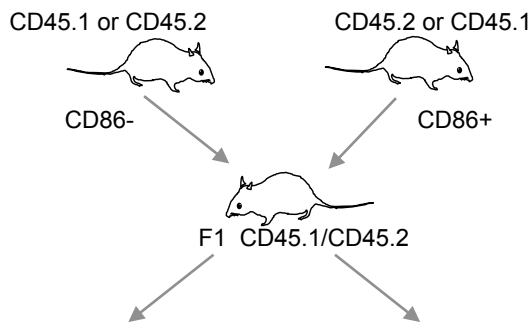**B**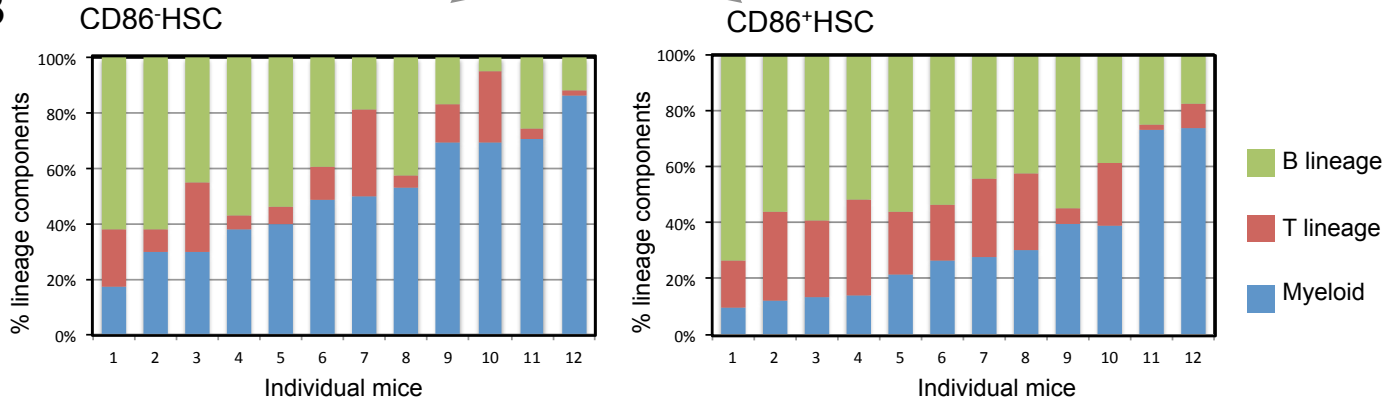**C**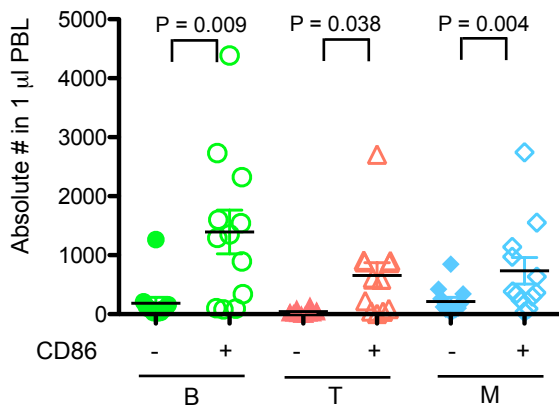**D**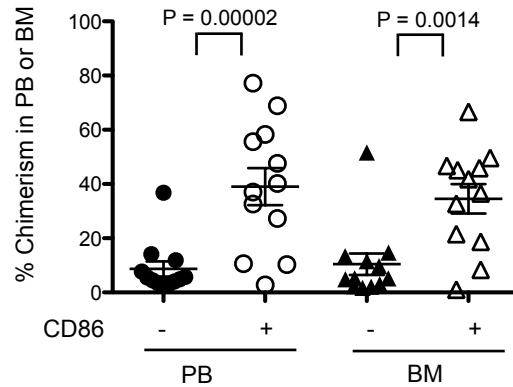

**Figure S1.** CD86<sup>-</sup> CD150<sup>Hi</sup> HSCs are poor at restoring the adaptive immune system. **(A)** A schematic representation of the experimental design is shown. Two hundred CD86<sup>-</sup> and CD86<sup>+</sup> CD150<sup>Hi</sup> HSCs from 10 mo old mice were transplanted together into CD45.1/CD45.2 F1 mice along with  $2 \times 10^5$  whole bone marrow cells. The donor type cells were always distinct with respect to CD45 alleles, and reciprocal CD45.1/CD45.2 combinations were used as indicated in the diagram. **(B)** Peripheral blood contributions were determined by flow cytometry 5 mo after transplantation. Myeloid cells predominated in recipients of CD86<sup>-</sup> HSC compared to CD86<sup>+</sup> HSC ( $P < 0.05$ ). **(C)** Absolute numbers of lymphocytes derived from recipient of CD86<sup>-</sup> HSC (closed symbol) and CD86<sup>+</sup> HSC (open symbol) are indicated as green (B cells), red (T cells) and blue (Myeloid cells). The data are representative of those obtained in two independent experiments ( $n=14$ ). **(D)** Chimerism of donor cells in peripheral blood (PB) and bone marrow (BM) are shown as circles and triangles, respectively. Donor cells from CD86<sup>-</sup> and CD86<sup>+</sup> cells are indicated as closed and open symbols, respectively.

A

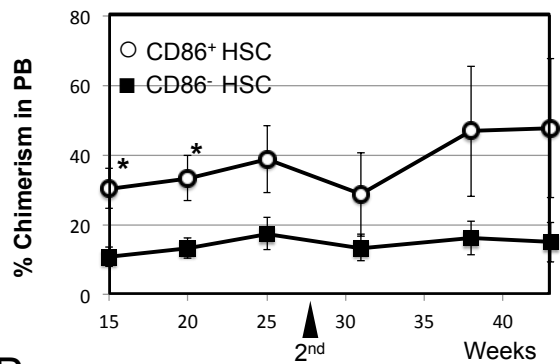

B

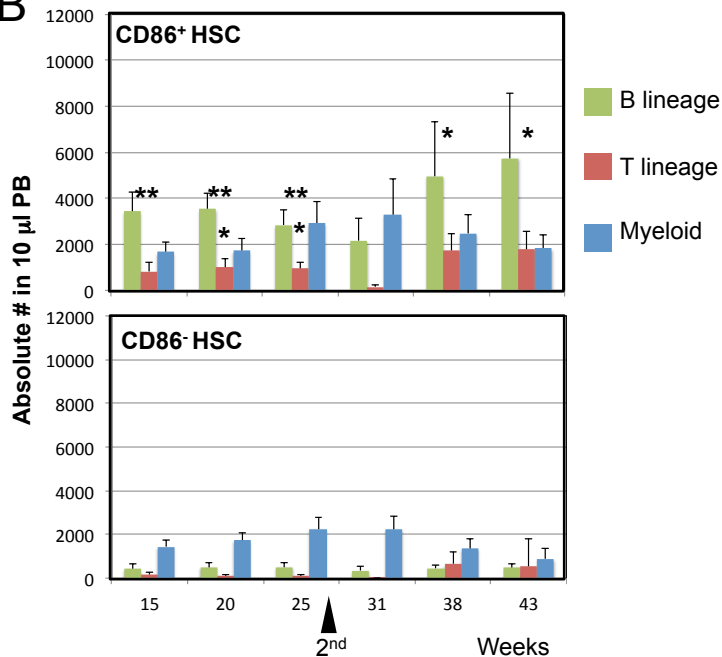

**Figure S2.** The poor chimerism achieved with CD86<sup>-</sup> HSC was usually not reversed by secondary transplantation and competence to produce B lineage lymphocytes remained low. **(A)** Two million whole bone marrow cells from transplanted mice (the same experiment as illustrated in Figure 3) were injected into lethally irradiated recipient (CD45.1 x CD45.2 F<sub>1</sub>) mice (marked by arrows). Peripheral blood samples were then analyzed at the indicated time points to determine donor cell chimerism. **(B)** Absolute numbers of myeloid, (GR-1 and/or CD11b), B (B220 plus CD19) or T (CD3) lineage marker bearing cells per 10 ml of blood were calculated and shown as mean ± SEM. Significant differences between the two groups (upper versus lower panels) are indicated (\*\* P < 0.01 and \*P < 0.05). Low CD86<sup>-</sup> derived chimerism in secondary recipients was also seen in two additional experiments where the two subsets were transplanted to the same recipients.

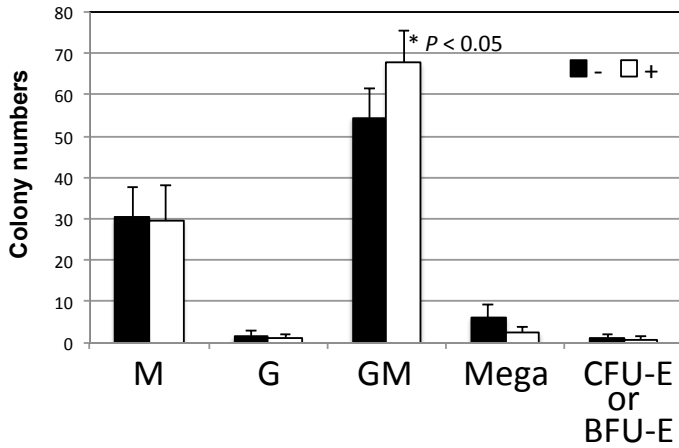

**Figure S3.** HSC subsets differing in CD86 expression have similar, but not identical potential to generate non-lymphoid cells. Two hundred CD150<sup>+</sup> CD48<sup>-</sup> Flt3<sup>-</sup> cells of each type were independently sorted from three mice and cultured in Methocult medium. Colonies were counted and discriminated on the basis of morphologies 9 days later. The results are given as mean colony numbers  $\pm$  SEM. (\*  $P < 0.05$ ). The slight difference in GM colonies was seen in two additional experiments.

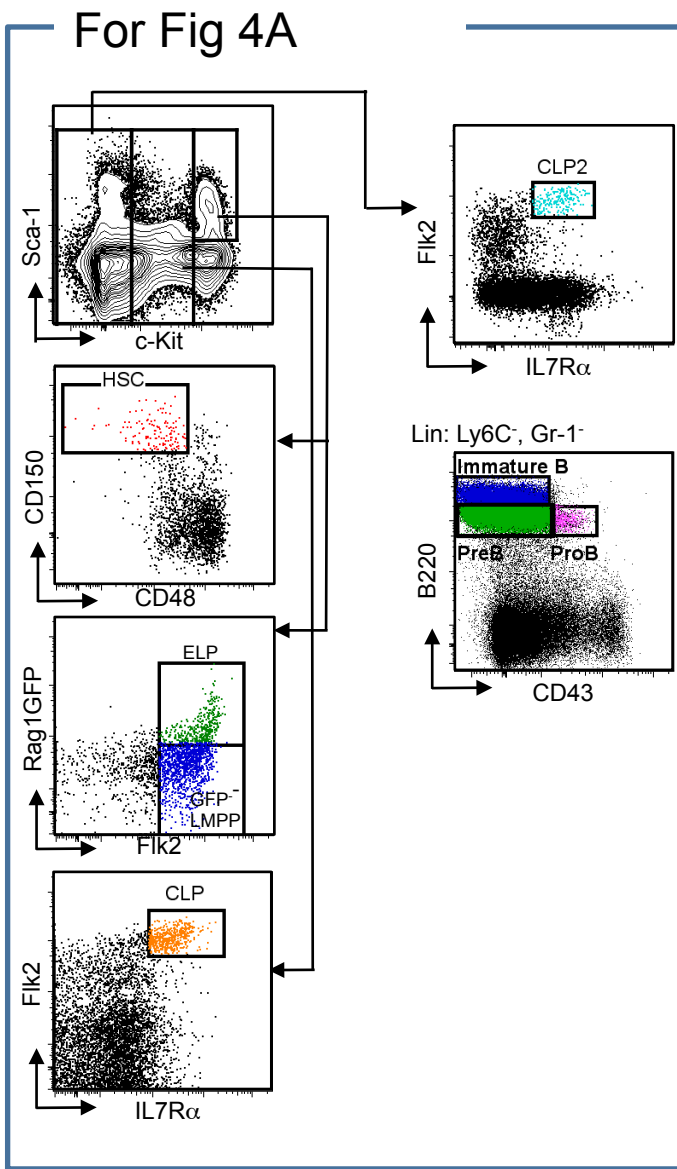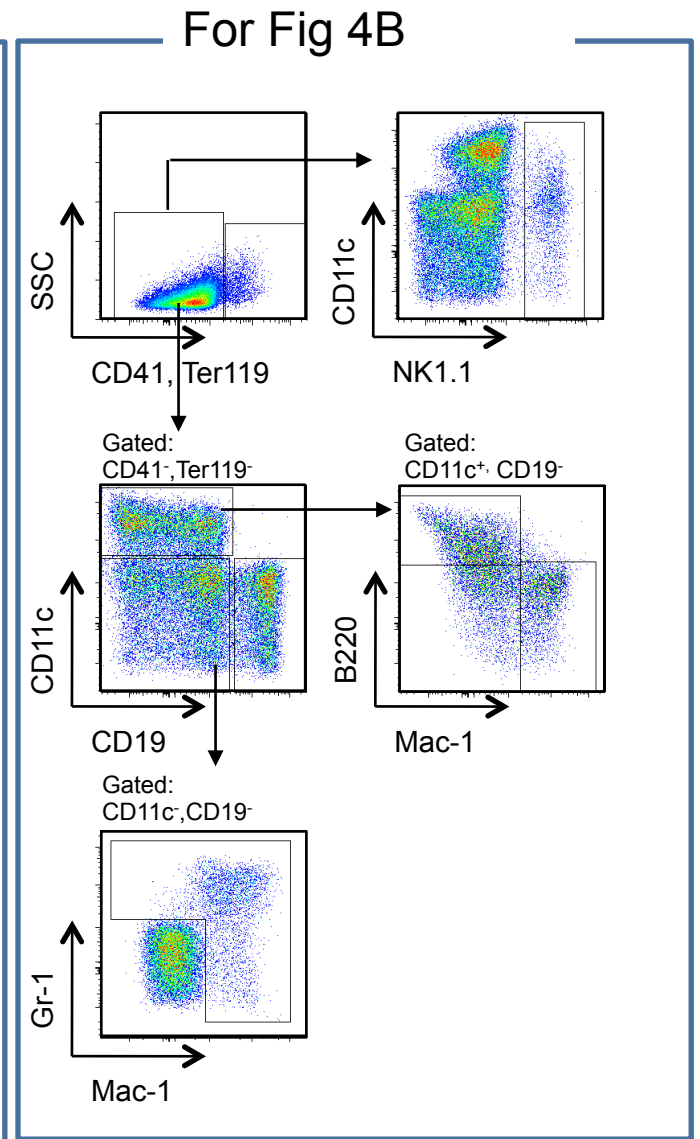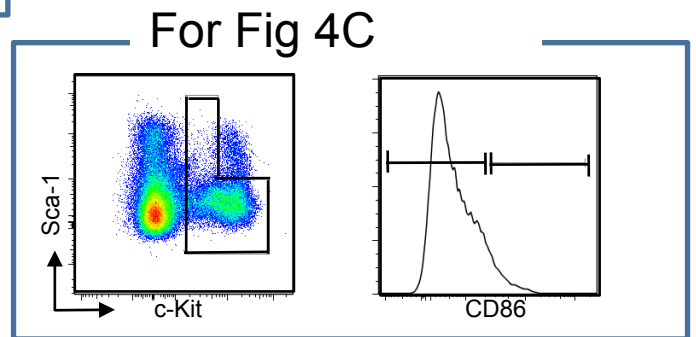

**Figure S4.** Resolution and characterization of CD86 expression on progenitors that were freshly isolated (corresponding to Figure 4A). Cultured cells of CD86<sup>Hi</sup> or CD86<sup>Lo</sup> LMPP were resolved according to indicated lineage specific markers (corresponding to Figure 4B). The color codes correspond to those used in the primary figures. CD86<sup>+</sup> and CD86<sup>-</sup> cells in Lin<sup>-</sup> c-Kit<sup>+</sup> cells were sorted to specifically exclude the Sca-1<sup>+</sup> c-Kit<sup>Hi</sup> fraction (corresponding to Figure 4C).

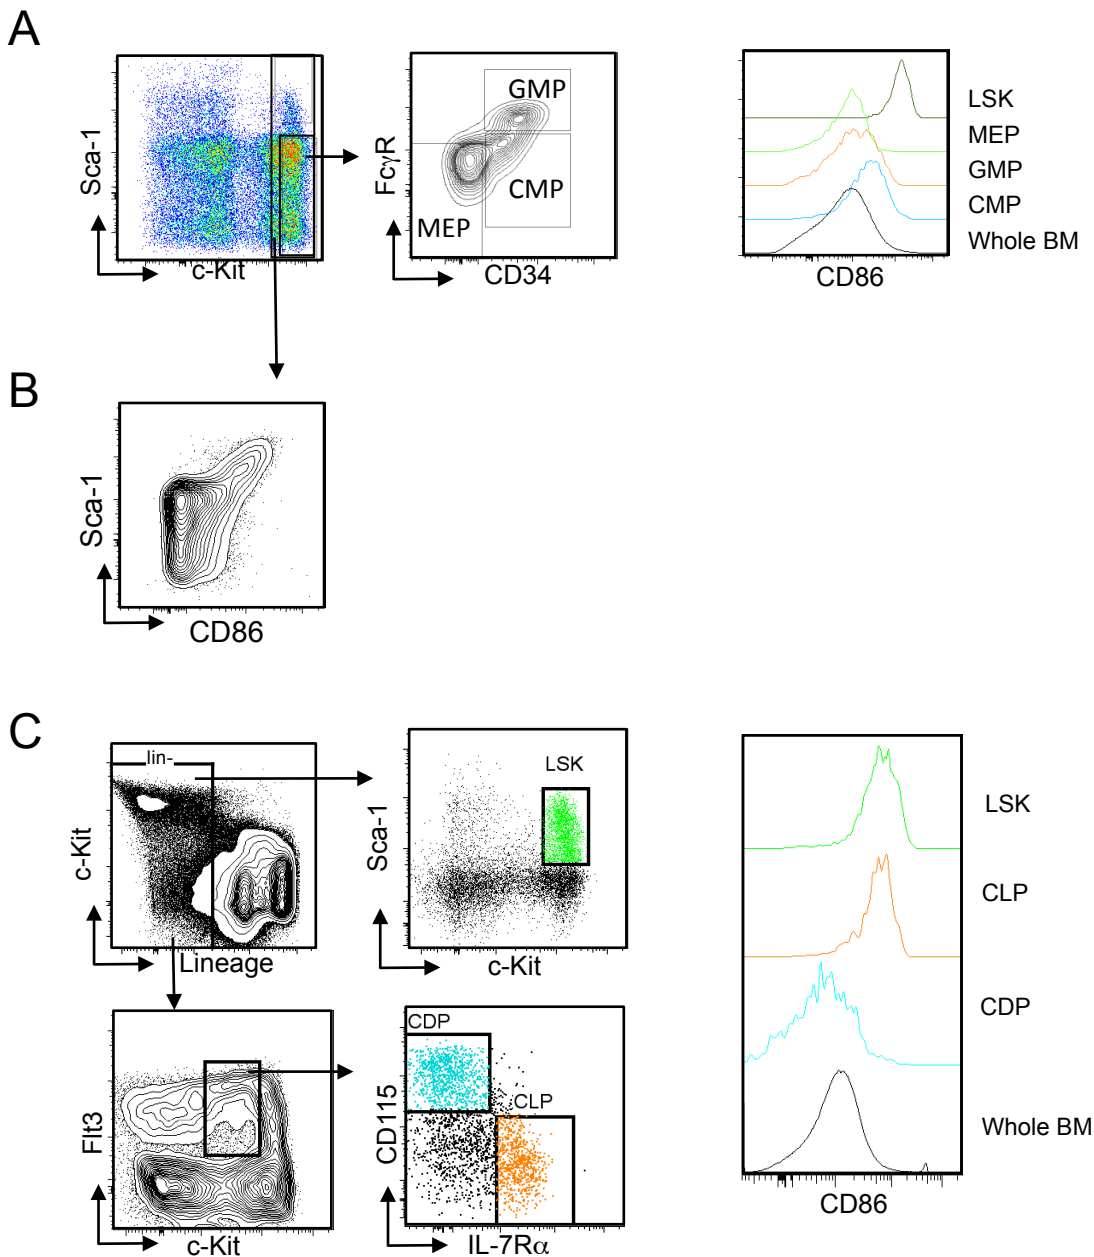

**Figure S5.** Demonstration of gates used to resolve hematopoietic cells and characterize their expression of CD86. **(A)** Myelo-erythroid progenitors (MEP: Lin<sup>-</sup>, ckit<sup>Hi</sup>, Sca-1<sup>-</sup>, CD34<sup>-</sup>, FcγR<sup>+</sup>), common myeloid progenitors (CMP: Lin<sup>-</sup>, ckit<sup>Hi</sup>, Sca-1<sup>-</sup>, CD34<sup>+</sup>, FcγR<sup>Lo</sup>), and granulocyte progenitors (GMP: Lin<sup>-</sup>, ckit<sup>Hi</sup>, Sca-1<sup>-</sup>, CD34<sup>+</sup>, FcγR<sup>+</sup>), were evaluated according to the gates shown. **(B)** The stem/progenitor rich Lin<sup>-</sup> c-Kit<sup>Hi</sup> marrow population was analyzed with respect to Sca-1 and CD86 expression. **(C)** Common lymphoid progenitors, but not common dendritic progenitors (CDP: Lin<sup>-</sup>, ckit<sup>Lo</sup>, Flt3<sup>+</sup>, CD115<sup>+</sup>) are CD86<sup>+</sup>. LSK and whole bone marrow were used as positive and negative controls.

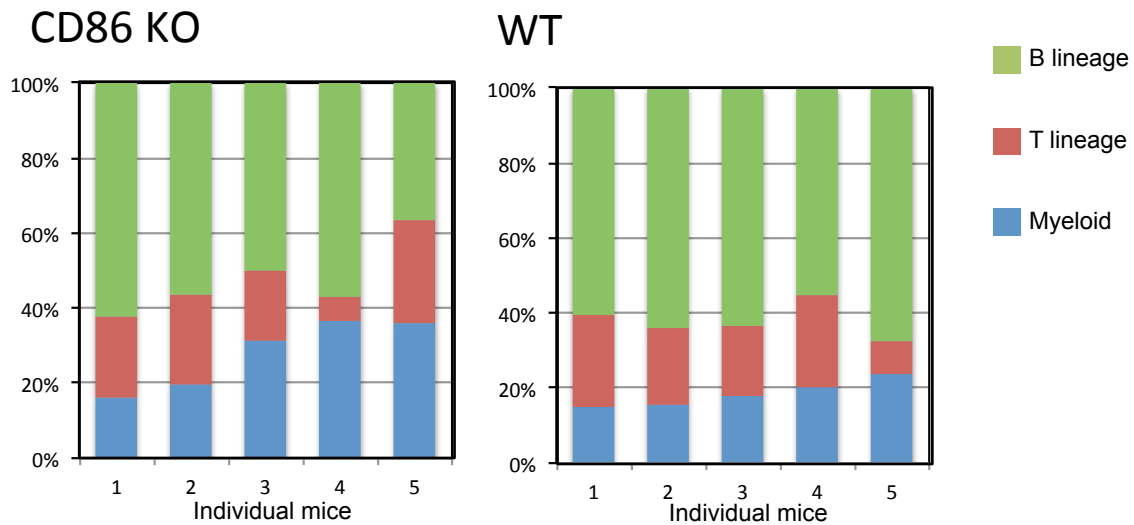

**Figure S6.** Hematopoiesis is not altered by targeting of the CD86 gene. Two hundred CD150<sup>+</sup> CD48<sup>-</sup> LSK from WT and CD86KO (CD45.2) animals were injected separately into recipient (CD45.1 x CD45.2 F<sub>1</sub>) mice. Five months later, peripheral blood samples were analyzed, and no evidence for lineage skewing was found. Therefore, whole BM from the primary recipients were transplanted a second time. The bars show percentages of donor type cells that expressed myeloid, (GR-1 and/or CD11b), B (B220 plus CD19) or T (CD3) lineage markers in individual recipients five months later.

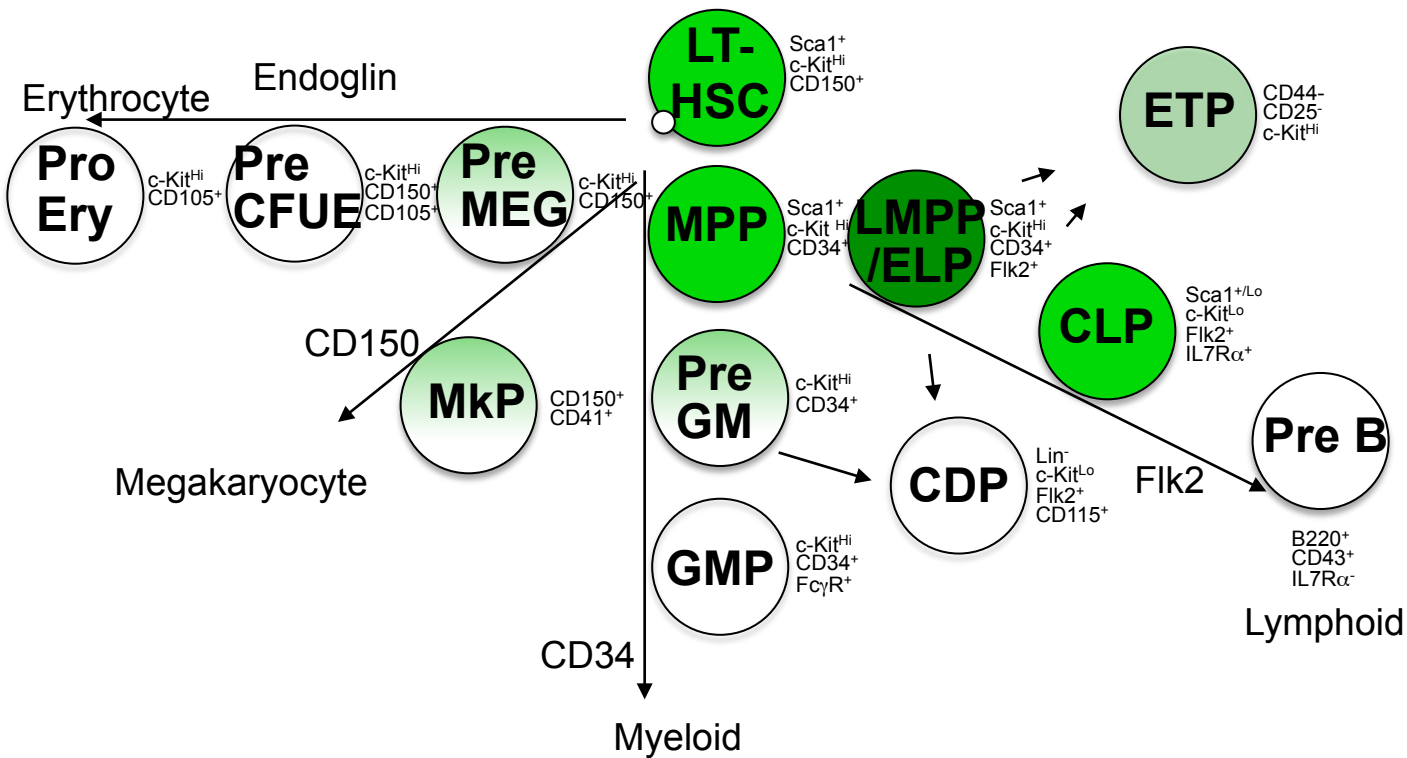

**Figure S7.** CD86 expression is down-regulated on progenitors destined to non-lymphoid fates. Stem and progenitor cells are arranged according to possible developmental relationships, using dark and light green shading to indicate strong and weak CD86 display, respectively. Partial shading of a cell type indicates some heterogeneity of the population, as demonstrated in primary Figures 4 and 5. While details of their resolution are given in the text, we indicate the most distinctive of characteristics for each cell type.

Supplemental Table I  
Cell number of each progenitors in 10<sup>6</sup> BM

Cell number in 10<sup>6</sup> BM

|        | N | LSK        | HSC      | MPP       | LMPP      | preGM     | preMegE    | preCFU-E | proEry     | CLP       |
|--------|---|------------|----------|-----------|-----------|-----------|------------|----------|------------|-----------|
| WT     | 3 | 1654 ± 290 | 291 ± 27 | 526 ± 111 | 833 ± 153 | 8399 ± 43 | 1879 ± 470 | 336 ± 94 | 1091 ± 470 | 909 ± 122 |
| CD86KO | 3 | 1540 ± 233 | 282 ± 26 | 509 ± 111 | 863 ± 130 | NT        | NT         | NT       | NT         | 1029 ± 84 |
